# Supplementary material for: Species-Directed Therapy for Leishmaniasis in Returning Travellers: A Comprehensive Guide
Source: PubMed Central journal article supplement (PMC4006727; doi:10.1371/journal.pntd.0002832), 2014-05-01

# Figure S1 - Forest plots comparing proportions cured within study-arms for treatment of patients with leishmaniasis

1a. Forest plot comparing proportions cured within study-arm for treatment with amphotericin B formulations of patients with visceral leishmaniasis caused by *L. donovani* from South Asia – observational studies

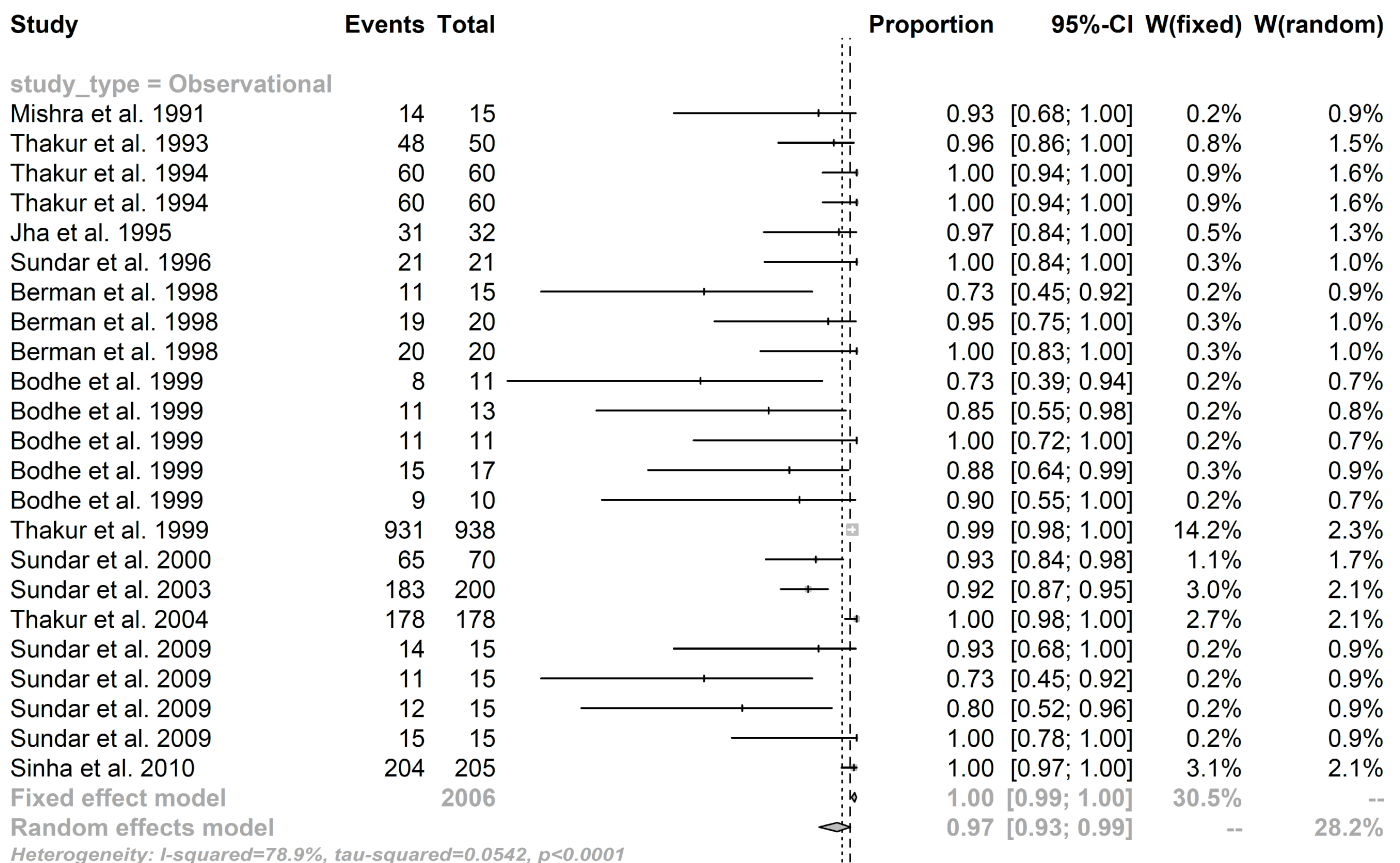

1b. Forest plot comparing proportions cured within study-arm for treatment with amphotericin B formulations of patients with visceral leishmaniasis caused by *L. donovani* from South Asia – randomized controlled trials

study\_type = RCT

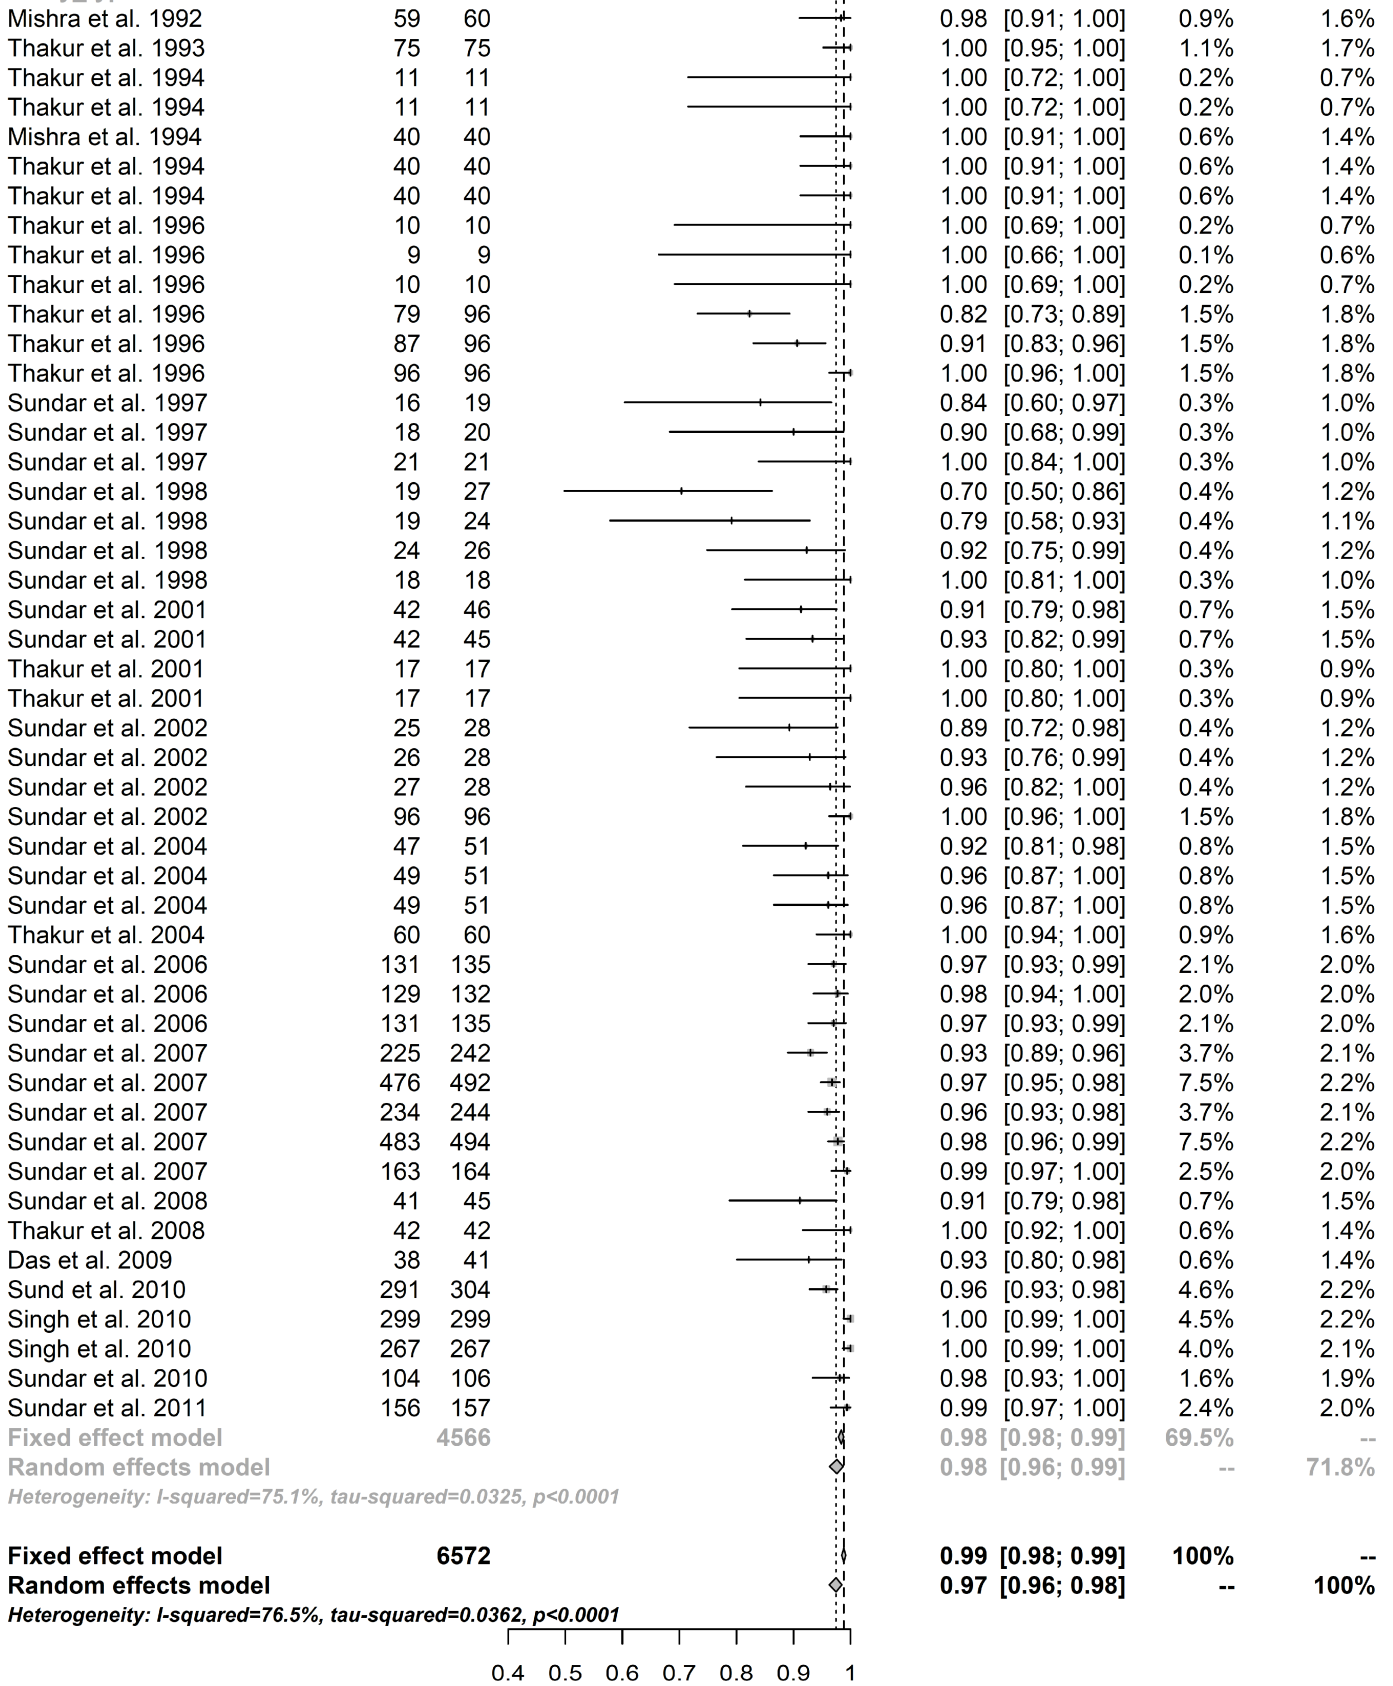

2. Forest plot comparing proportions cured within study-arm for treatment with miltefosine of patients with visceral leishmaniasis caused by *L. donovani* from South Asia

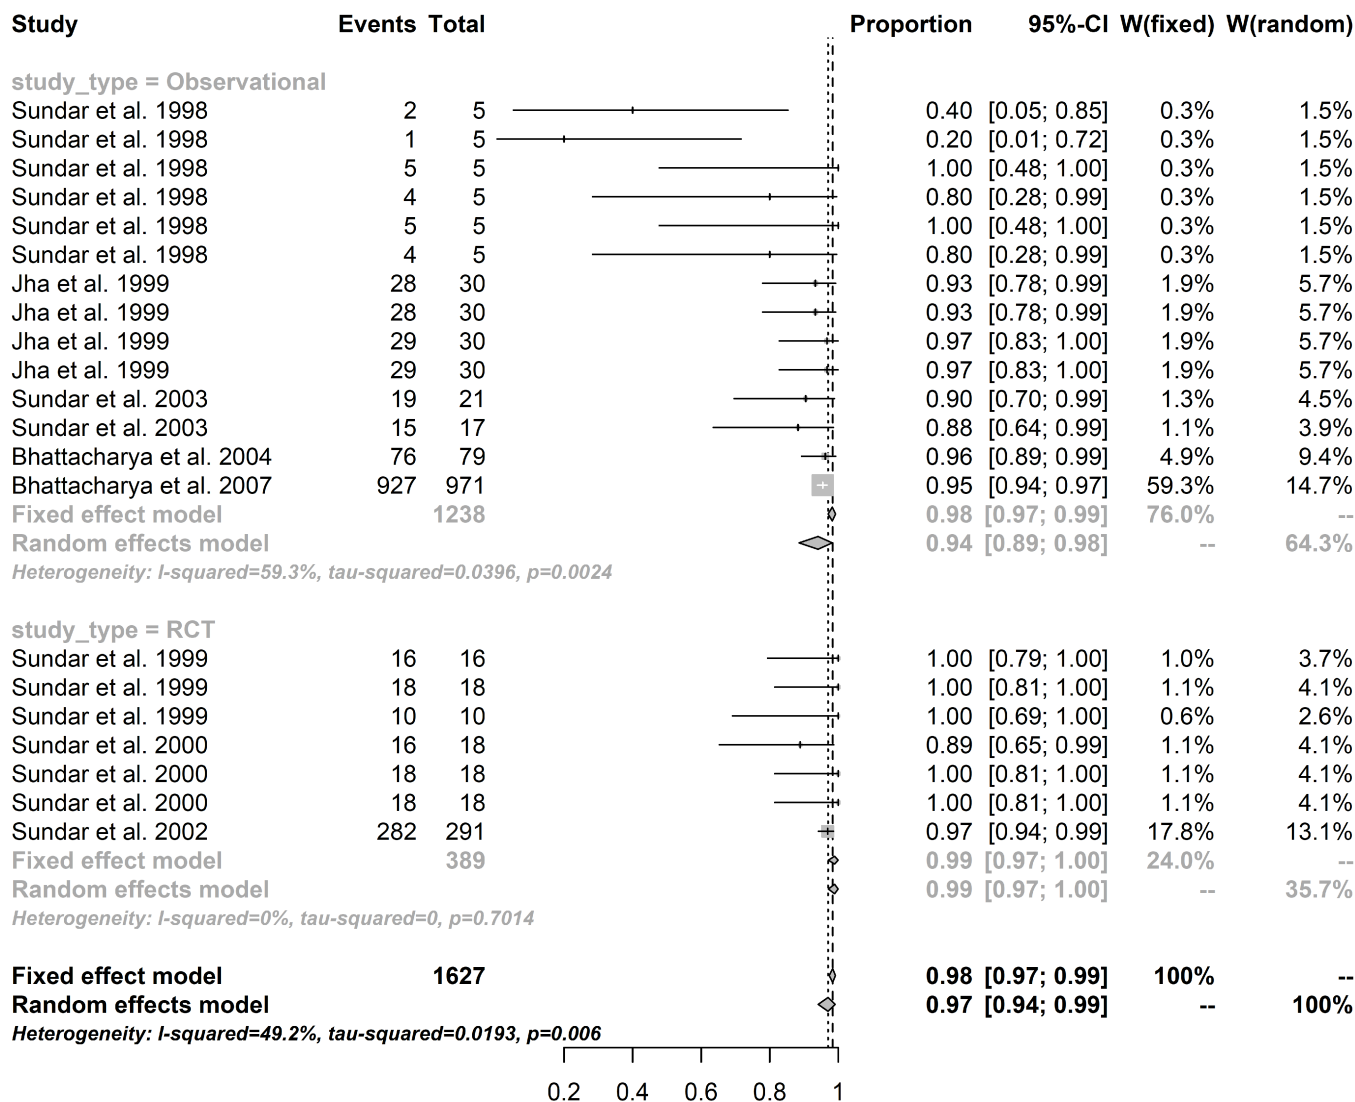

### 3. Forest plot comparing proportions cured within study-arm for treatment with systemic antimony of patients with visceral leishmaniasis caused by *L. donovani* from South Asia

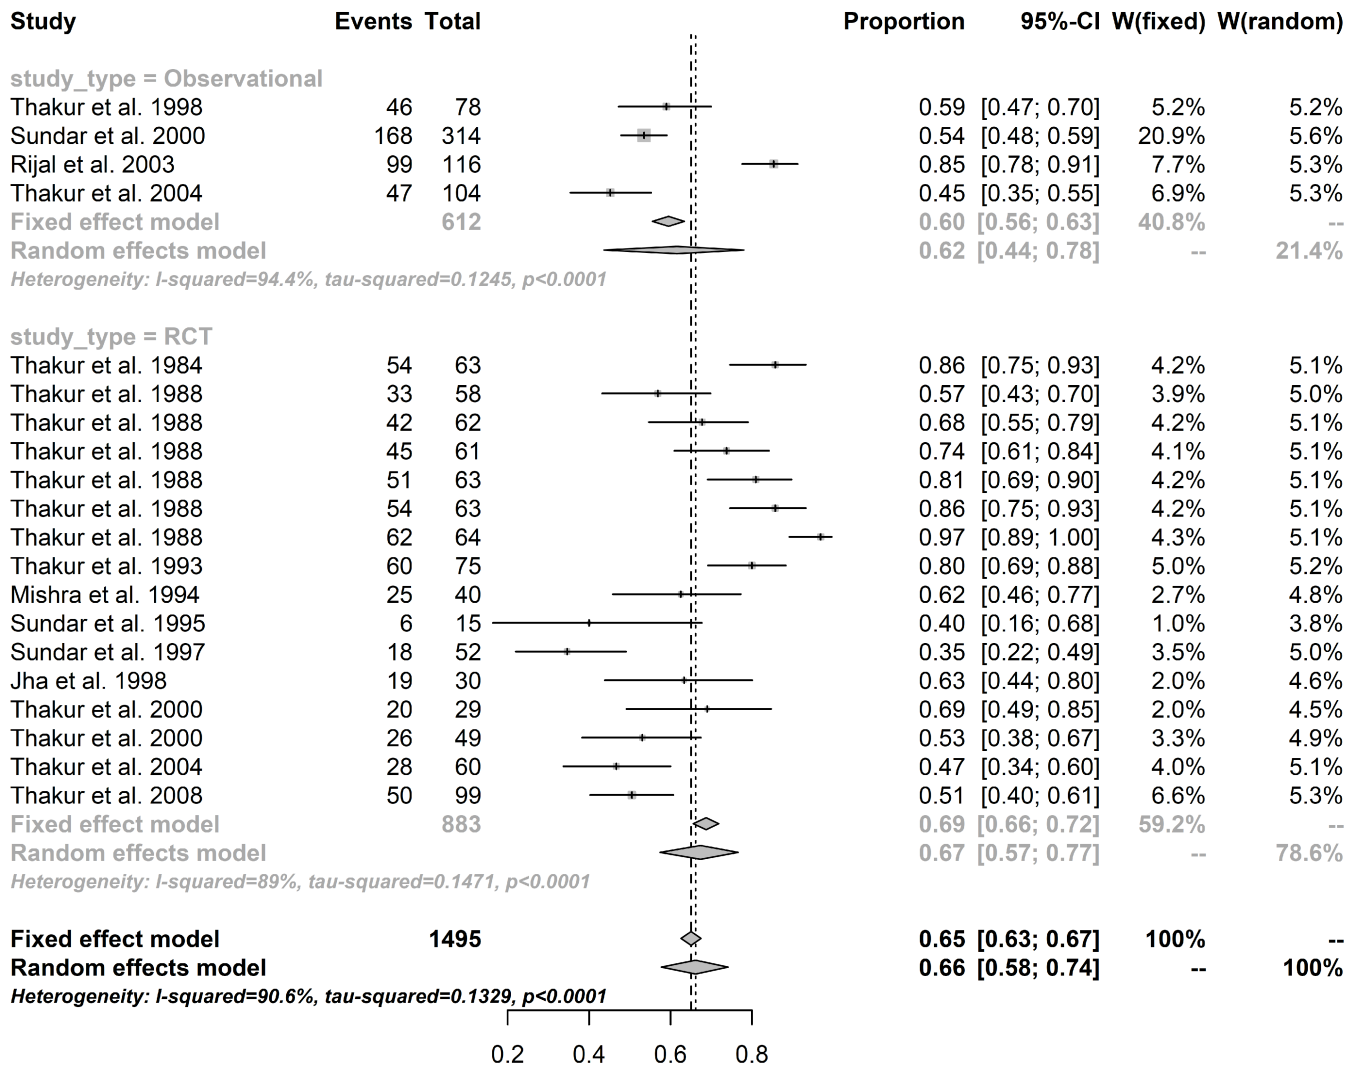

4. Forest plot comparing proportions cured within study-arm for treatment with amphotericin B formulations of patients with visceral leishmaniasis caused by *L. donovani* from East Africa

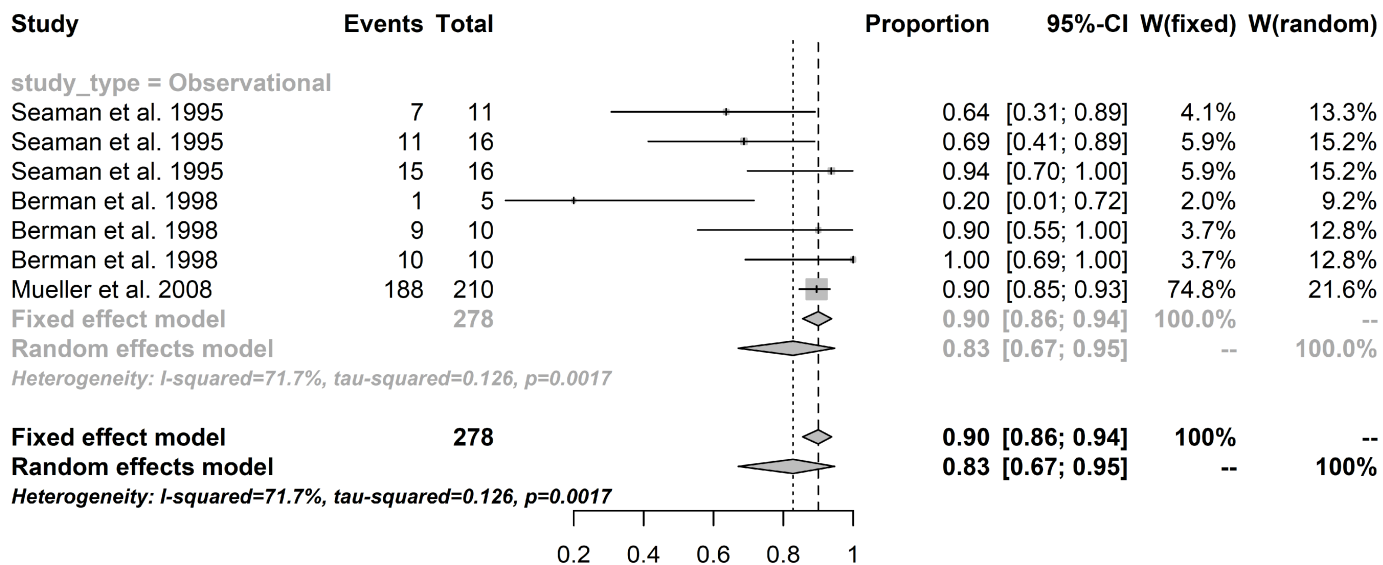

5. Forest plot comparing proportions cured within study-arm for treatment with systemic antimony of patients with visceral leishmaniasis caused by *L. donovani* from East Africa

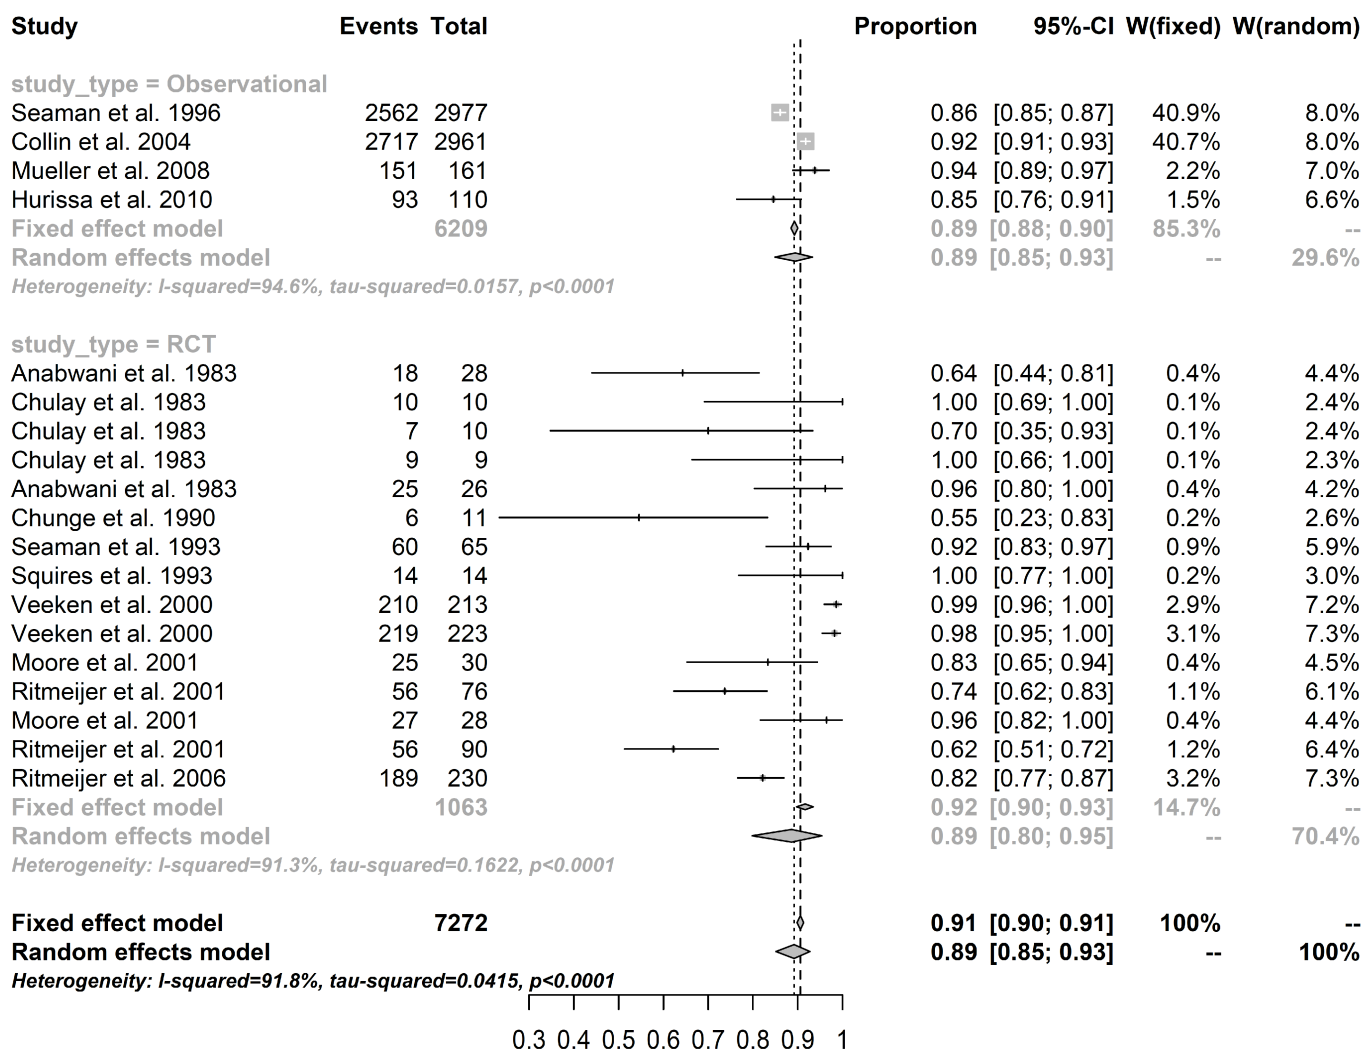

6. Forest plot comparing proportions cured within study-arm for treatment with amphotericin B formulations of pediatric patients with visceral leishmaniasis caused by *L. infantum* from the Old World

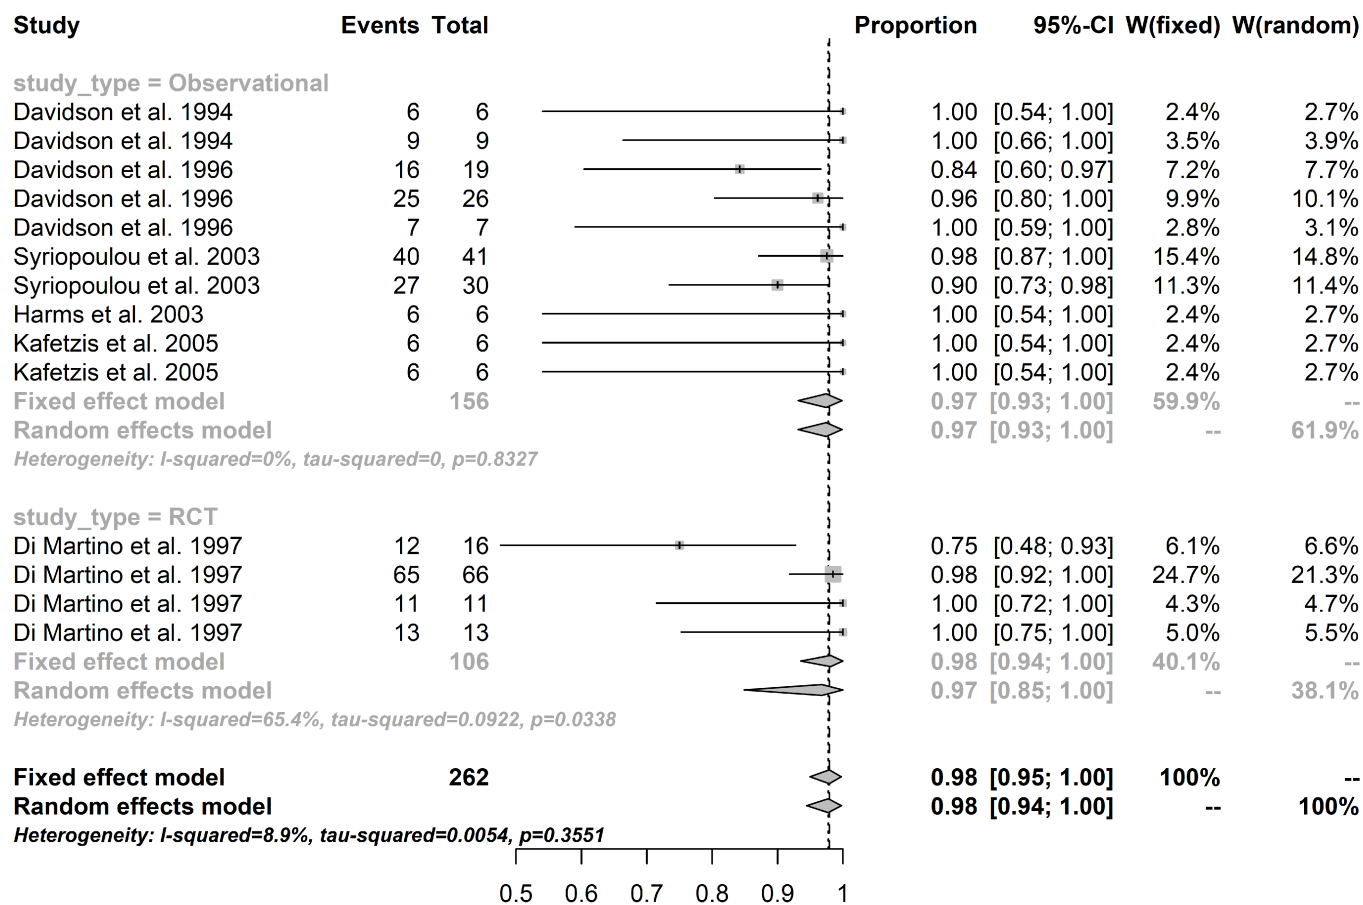

7. Forest plot comparing proportions cured within study-arm for treatment with systemic antimony of pediatric patients with visceral leishmaniasis caused by *L. infantum* from the Old World

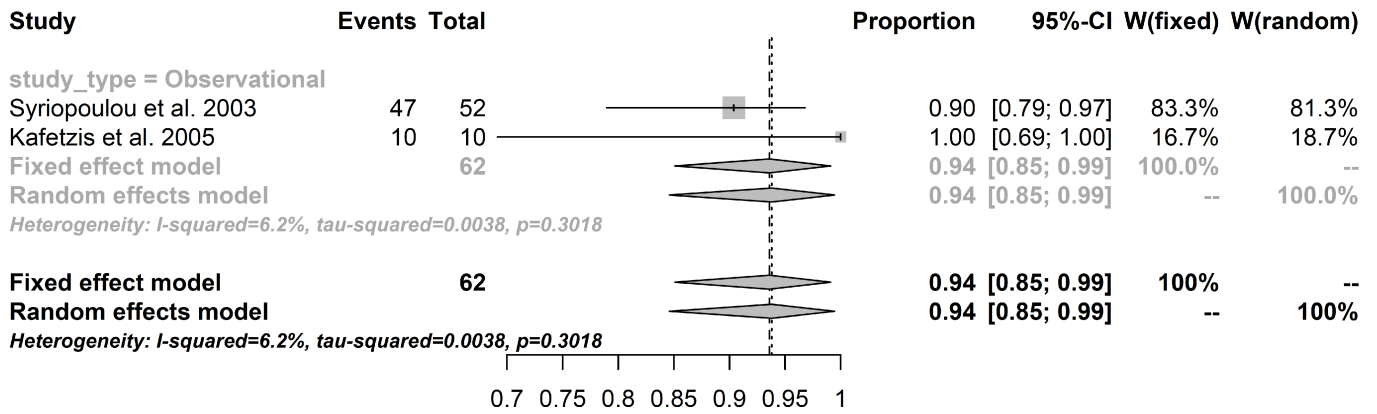



8. Forest plot comparing proportions cured within study-arm for treatment with amphotericin B formulations of adult patients with visceral leishmaniasis caused by *L. infantum* from the Old World

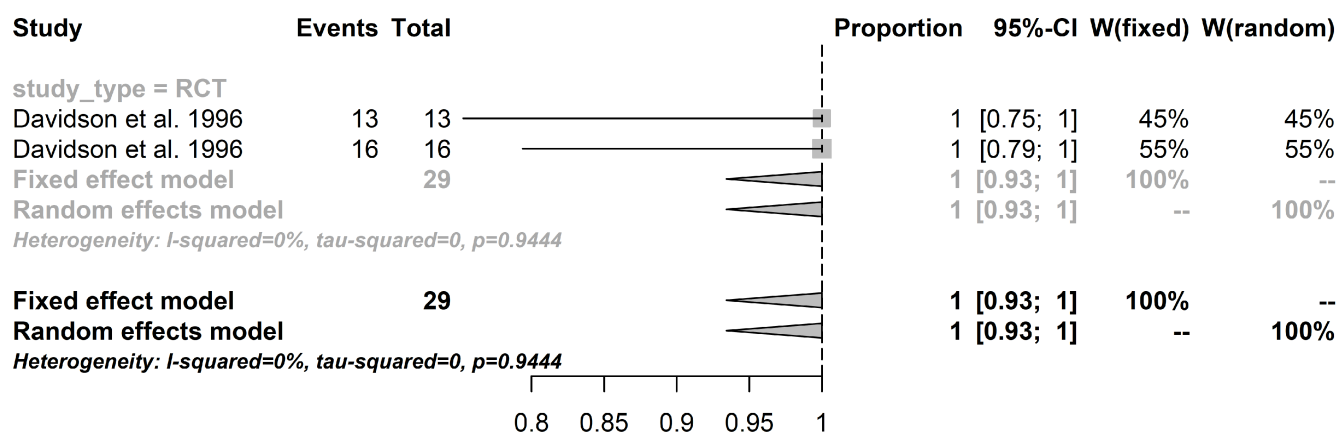

9. Forest plot comparing proportions cured within study-arm for treatment with intralesional antimony of patients with cutaneous leishmaniasis caused by *L. tropica*

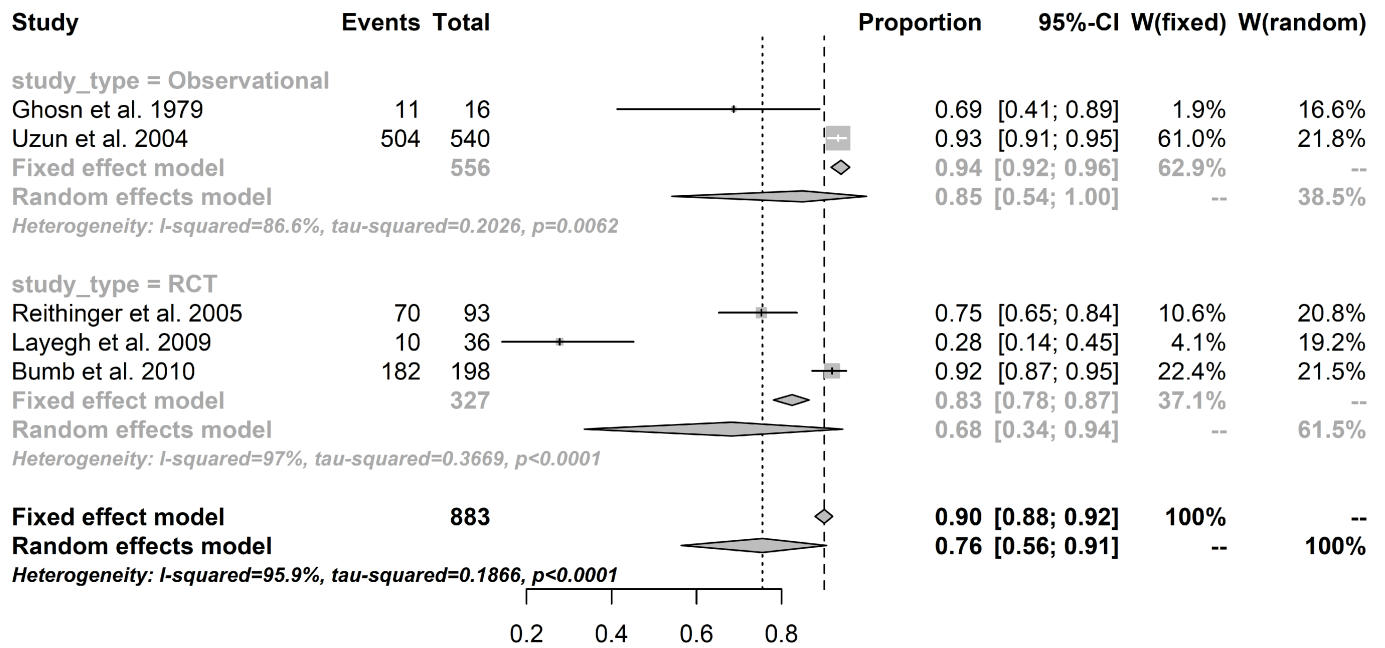

10. Forest plot comparing proportions cured within study-arm for treatment with systemic antimony of patients with cutaneous leishmaniasis caused by *L. tropica*

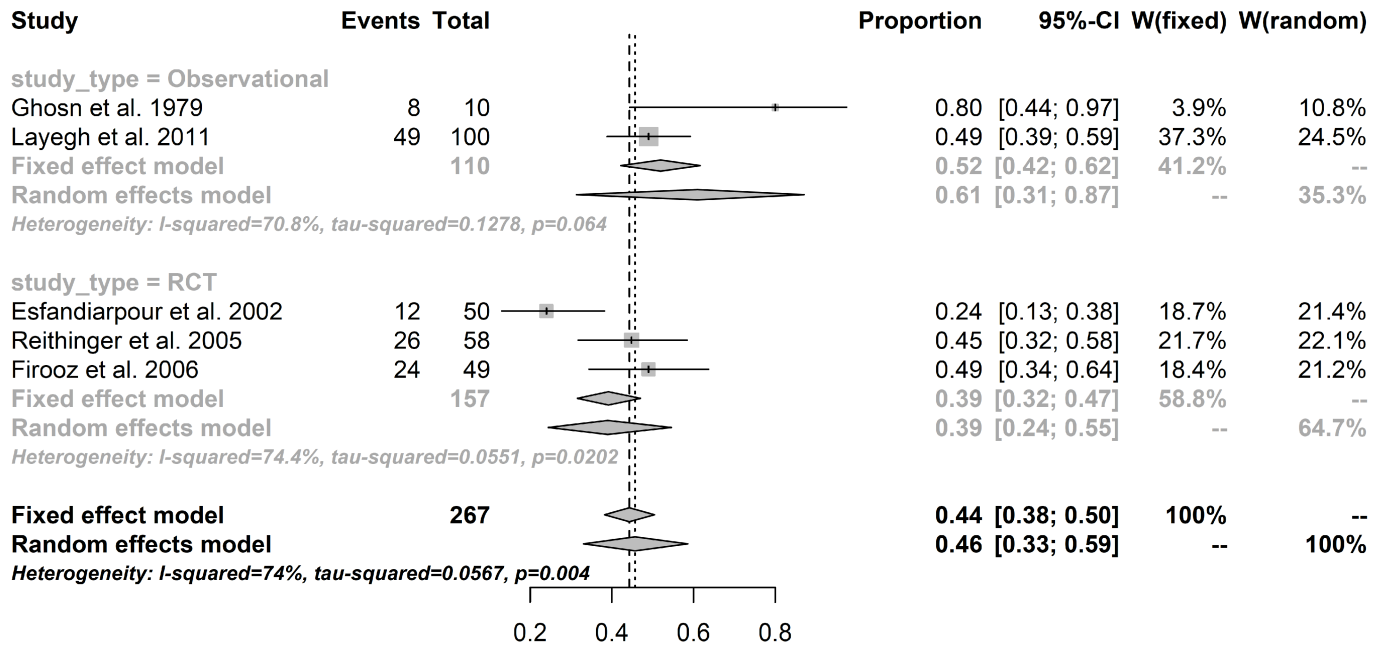

11. Forest plot comparing proportions cured within study-arm for treatment with intralesional antimony of patients with cutaneous leishmaniasis caused by *L. major*

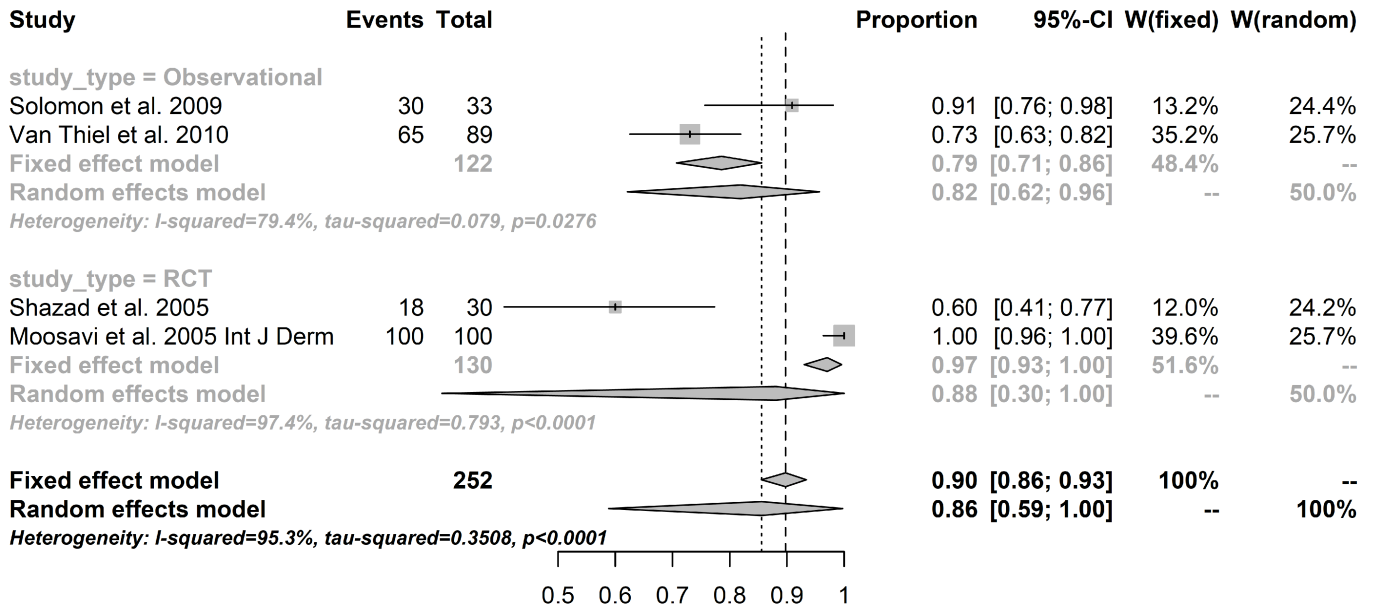

12. Forest plot comparing proportions cured within study-arm for treatment with miltefosine of patients with cutaneous leishmaniasis caused by *L. major*

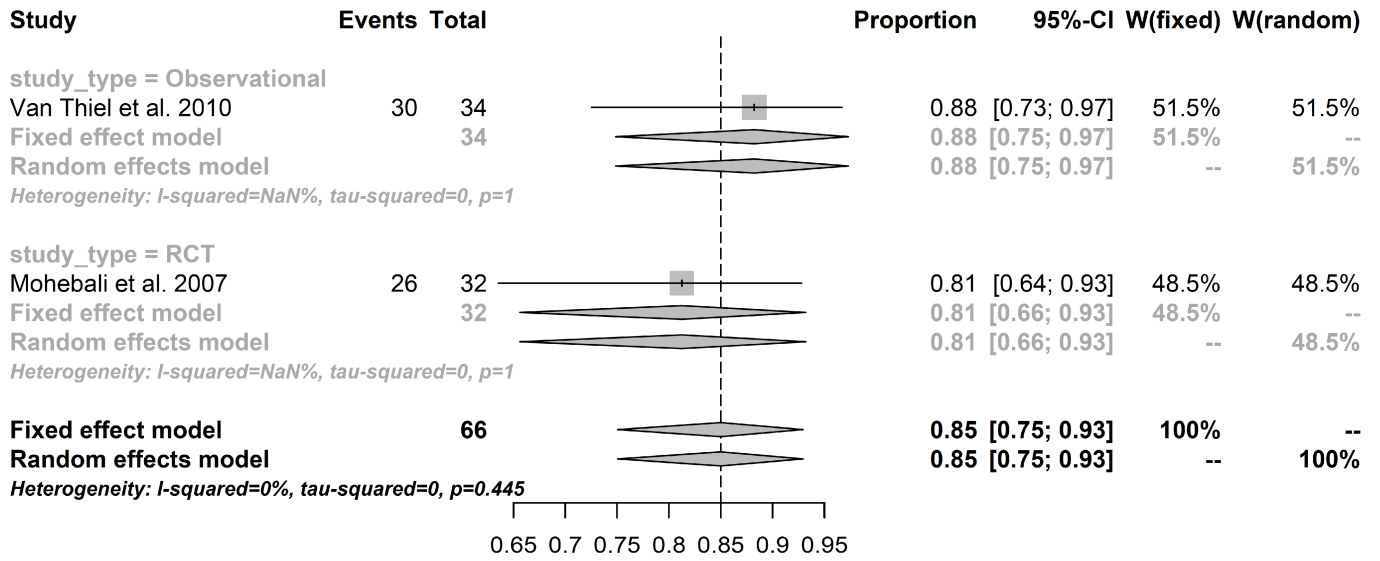

13. Forest plot comparing proportions cured within study-arm for treatment with systemic antimony of patients with cutaneous leishmaniasis caused by *L. major*

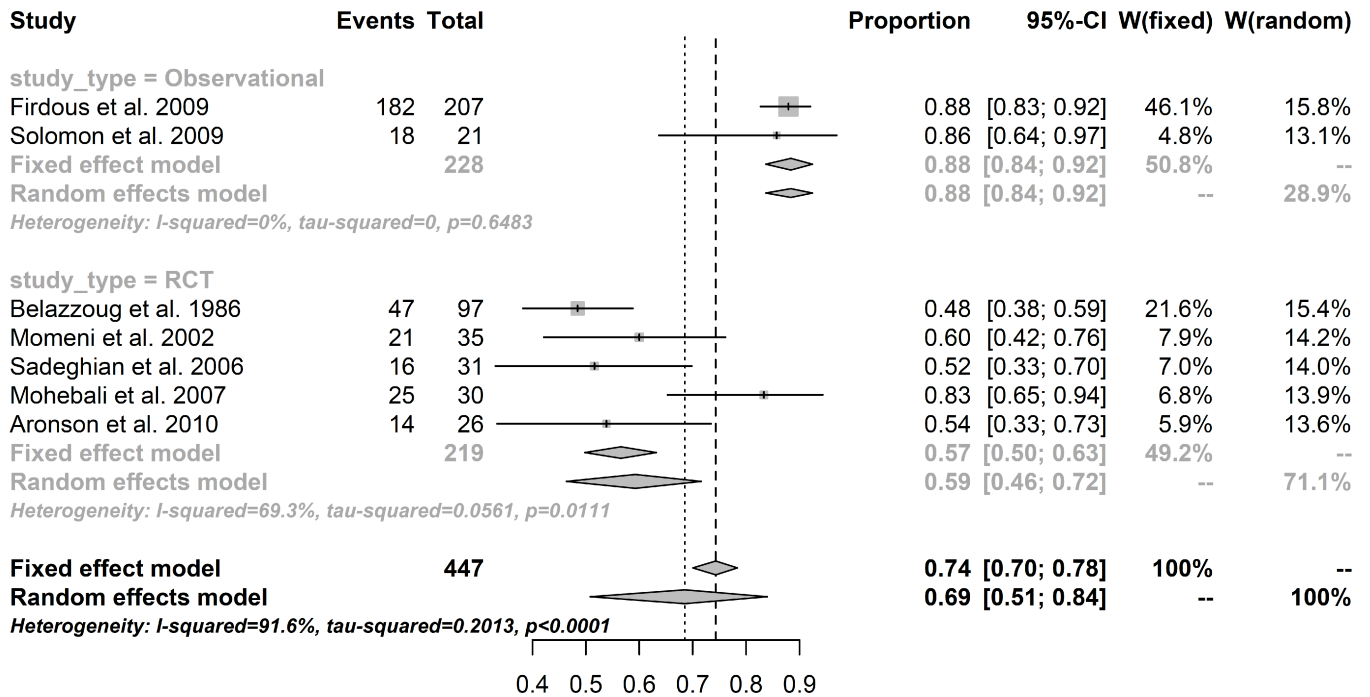

14. Forest plot comparing proportions cured within study-arm for treatment with the combination of intralesional antimony and cryotherapy of patients with cutaneous leishmaniasis caused by *L. major* or *L. tropica*

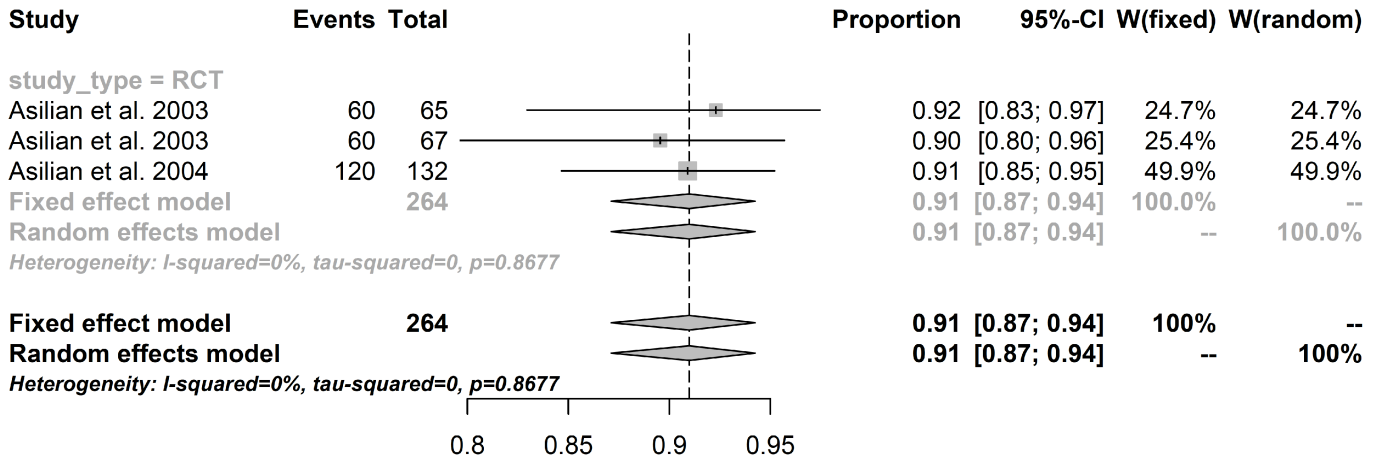

15. Forest plot comparing proportions cured within study-arm for treatment with intralesional antimony of patients with cutaneous leishmaniasis caused by *L. major* or *L. tropica*

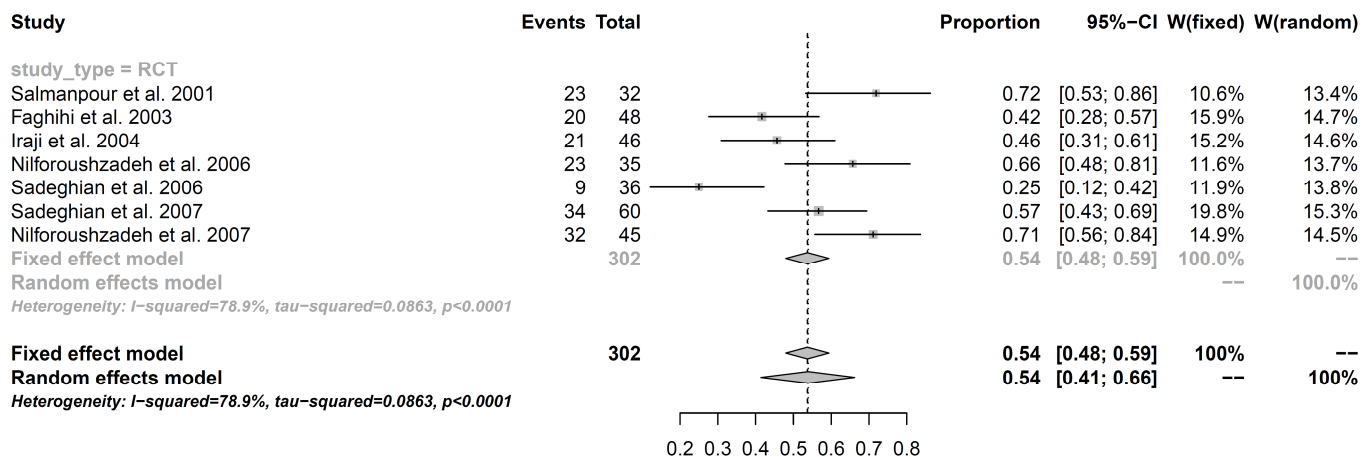



16. Forest plot comparing proportions of lesions cured within study-arm for treatment with intralesional antimony of patients with cutaneous leishmaniasis caused by *L. major* or *L. tropica*

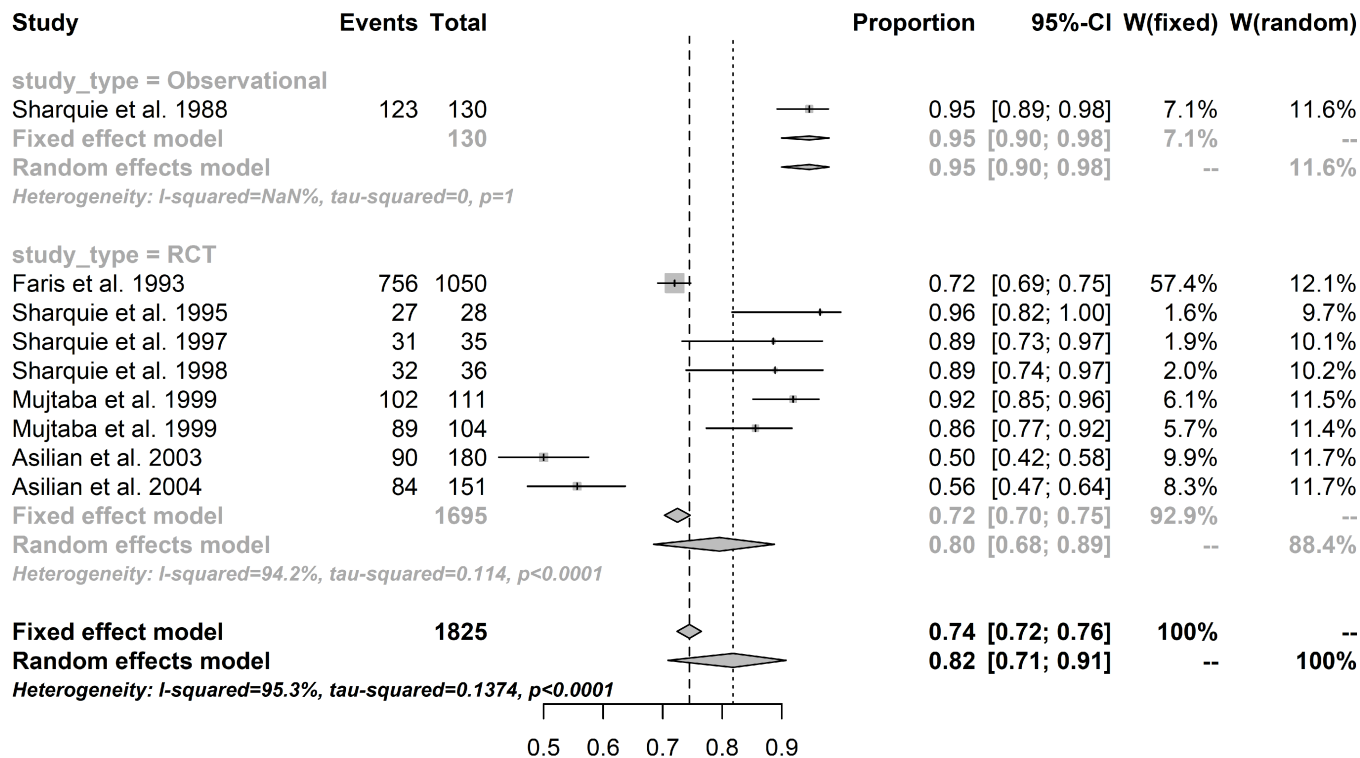

17. Forest plot comparing proportions cured within study-arm for treatment with heat therapy of patients with cutaneous leishmaniasis caused by *L. major* or *L. tropica*

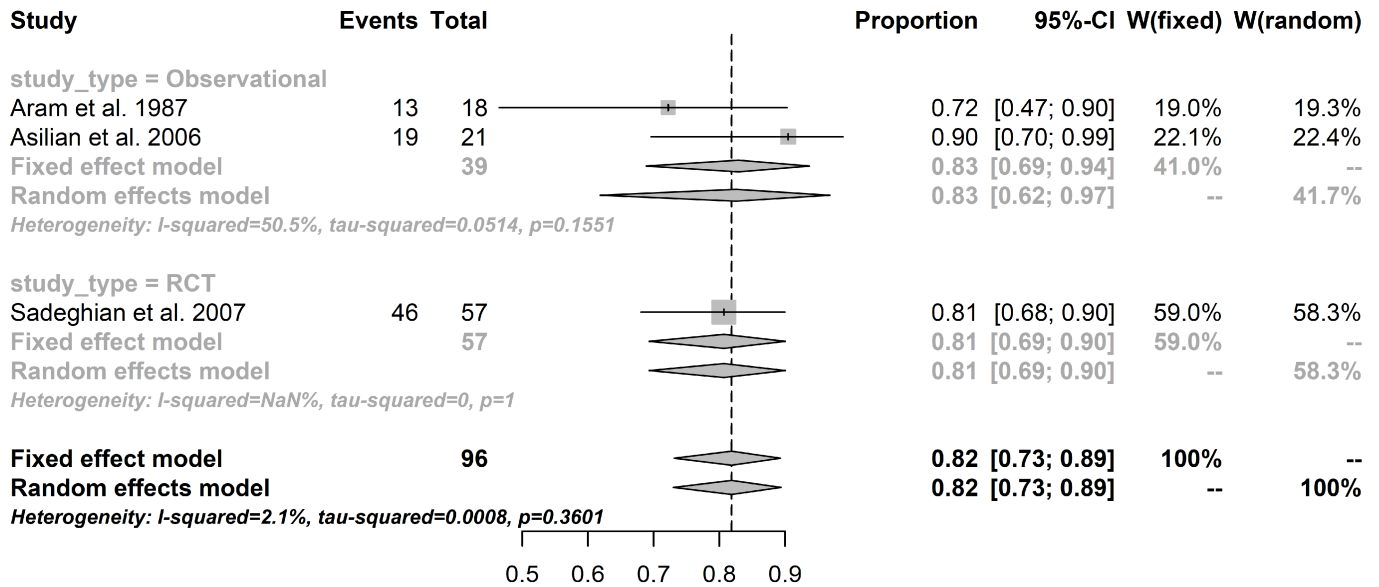

18. Forest plot comparing proportions of lesions cured within study-arm for treatment with heat therapy of patients with cutaneous leishmaniasis caused by *L. major* or *L. tropica*

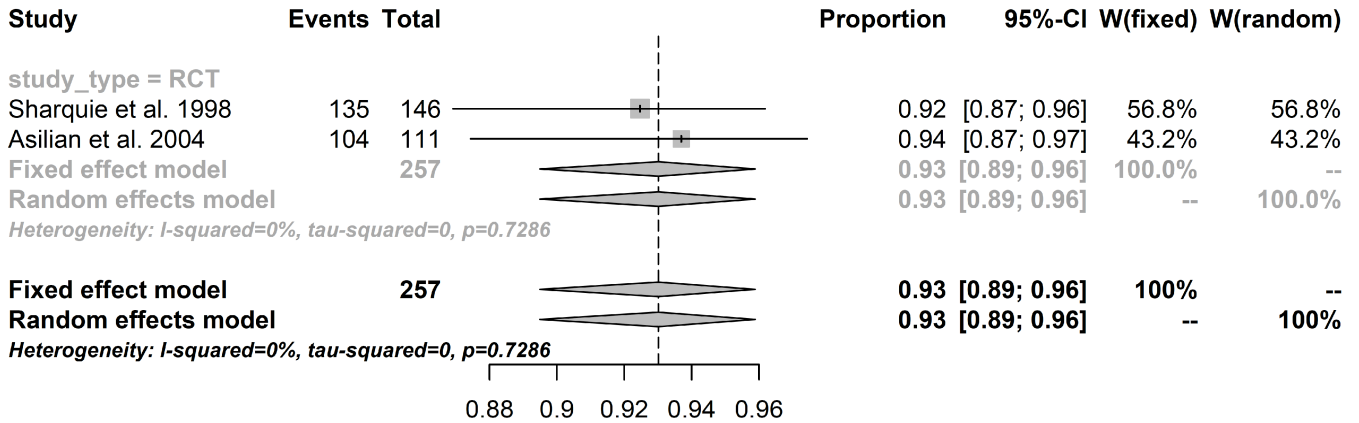

19. Forest plot comparing proportions cured within study-arm for treatment with systemic antimony of patients with cutaneous leishmaniasis caused by *L. major* or *L. tropica*

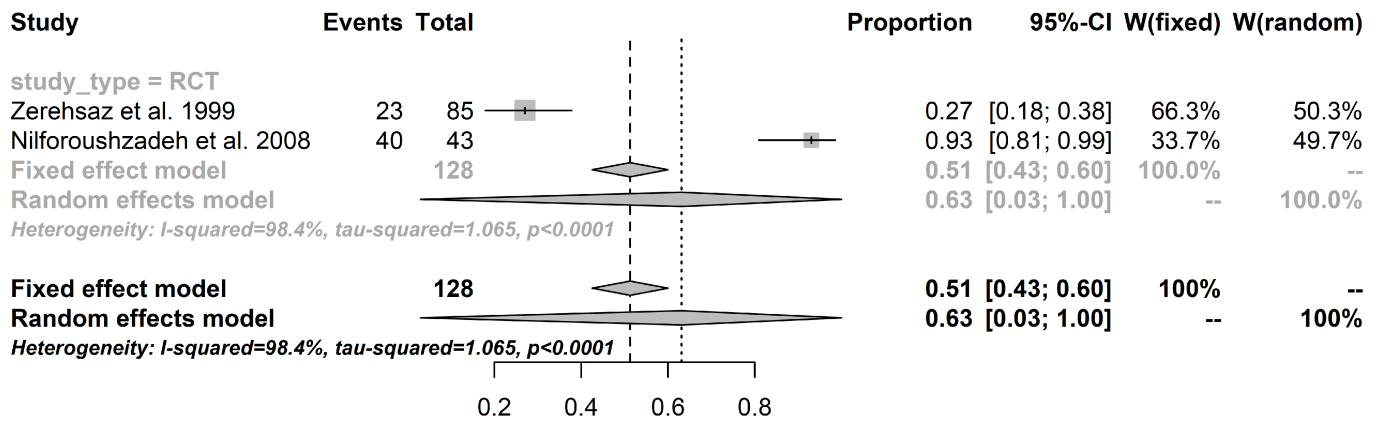

20. Forest plot comparing proportions of lesions cured within study-arm for treatment with systemic antimony of patients with cutaneous leishmaniasis caused by *L. major* or *L. tropica*

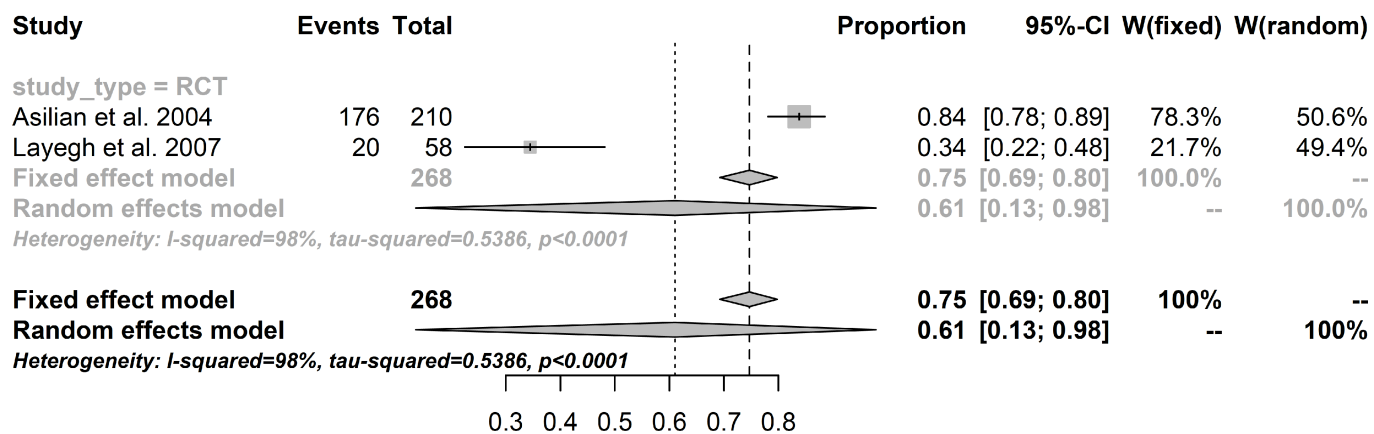

21. Forest plot comparing proportions cured within study-arm for treatment with amphotericin B formulations of patients with visceral leishmaniasis caused by *L. infantum* from South America ("*L. chagasi*")

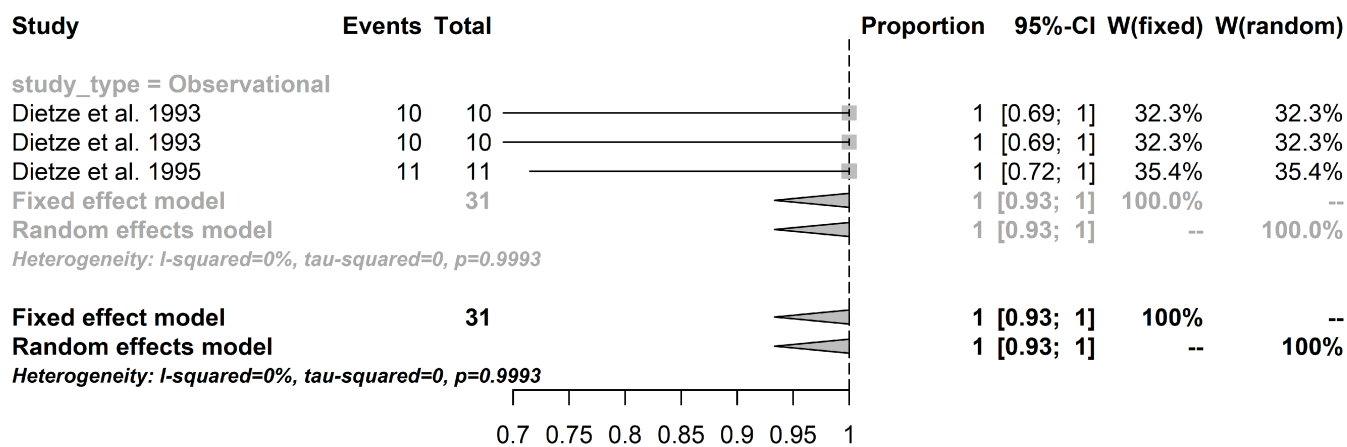

22. Forest plot comparing proportions cured within study-arm for treatment with systemic antimony of patients with cutaneous leishmaniasis caused by *L. mexicana*

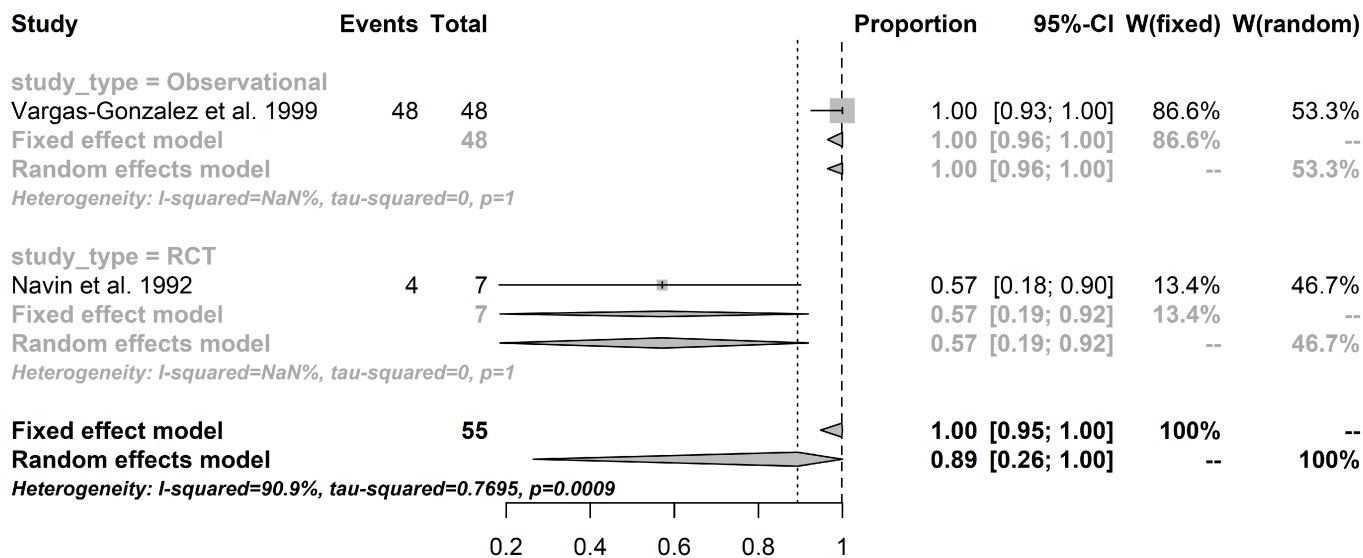

23. Forest plot comparing proportions cured within study-arm for treatment with systemic antimony of patients with cutaneous leishmaniasis caused by *L. braziliensis*

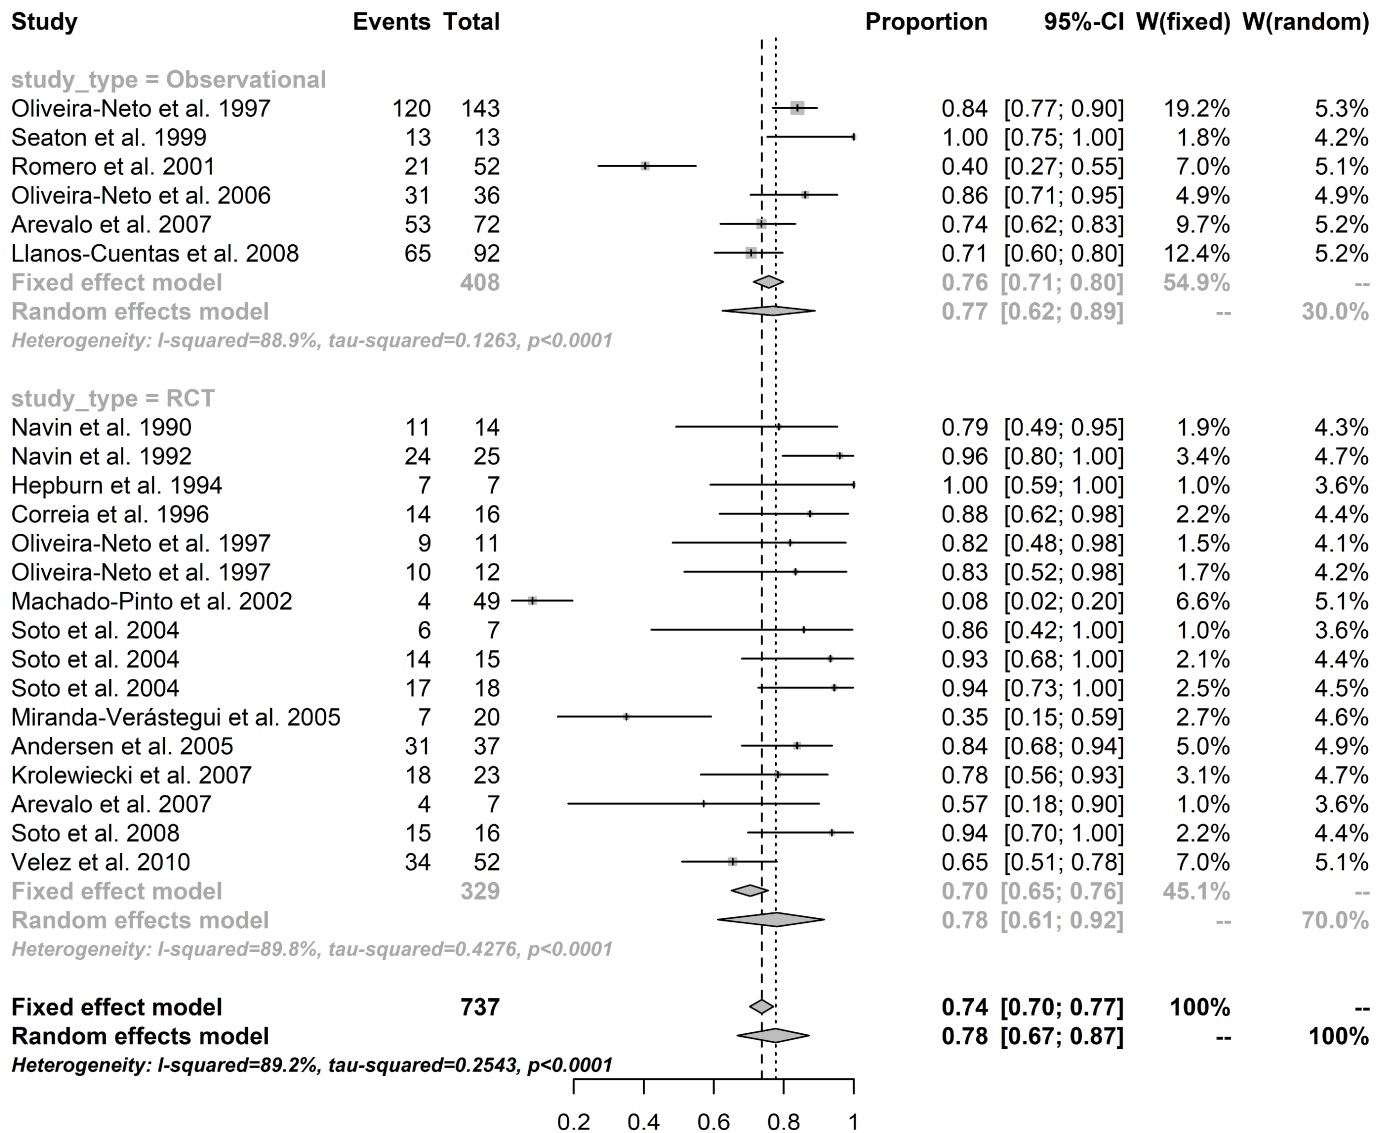



24. Forest plot comparing proportions cured within study-arm for treatment with miltefosine of patients with cutaneous leishmaniasis caused by *L. braziliensis*

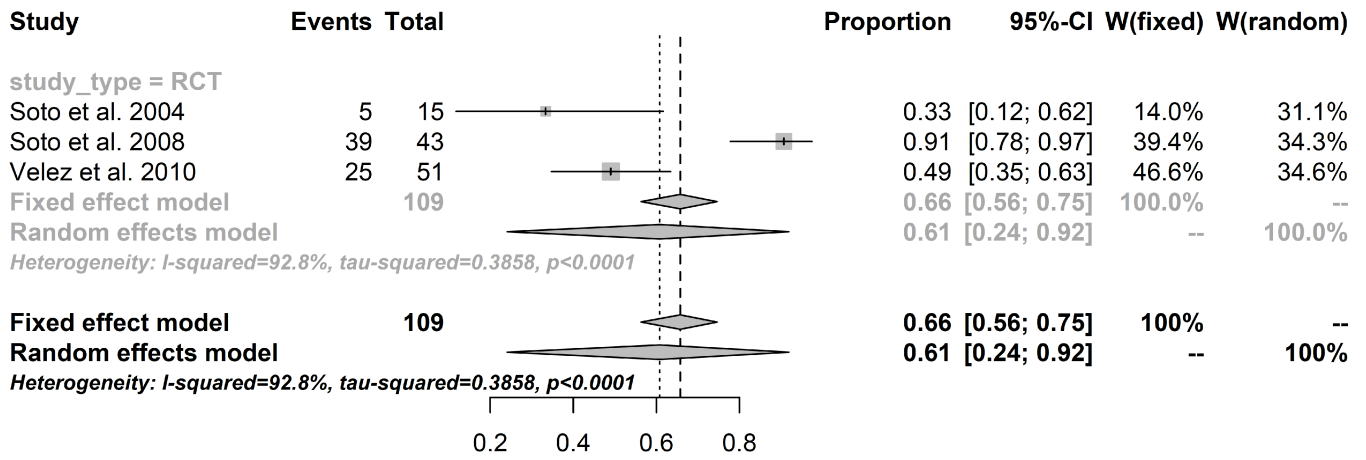

25. Forest plot comparing proportions cured within study-arm for treatment with the combination of systemic antimony and pentoxifylline of patients with mucocutaneous leishmaniasis caused by *L. braziliensis*

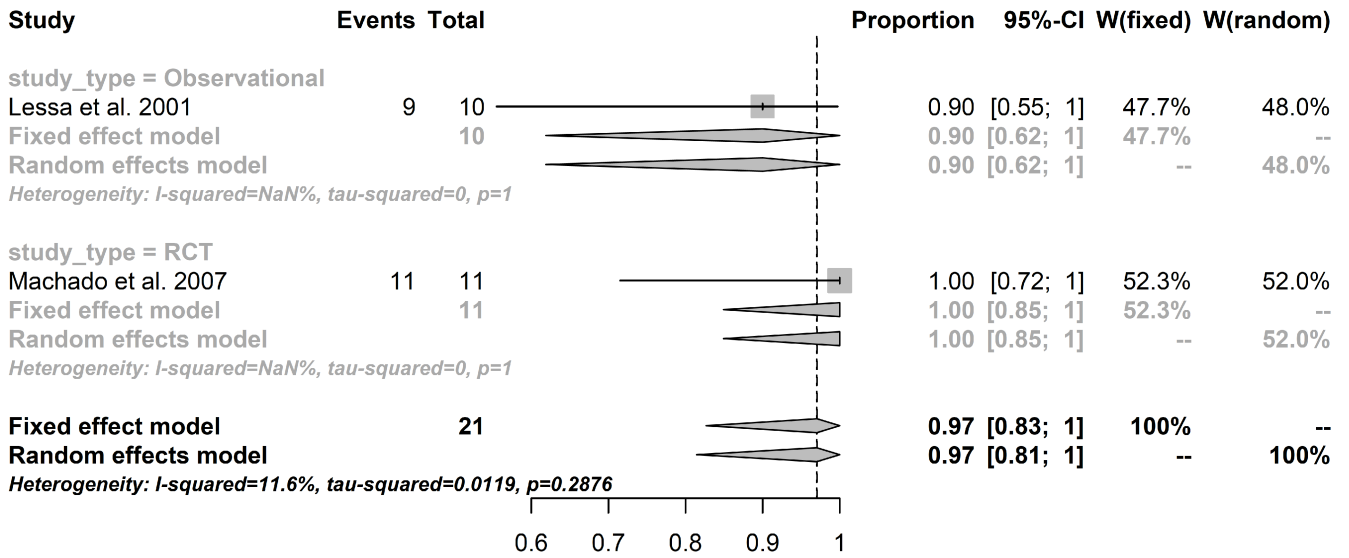

26. Forest plot comparing proportions cured within study-arm for treatment with systemic antimony of patients with mucocutaneous leishmaniasis caused by *L. braziliensis*

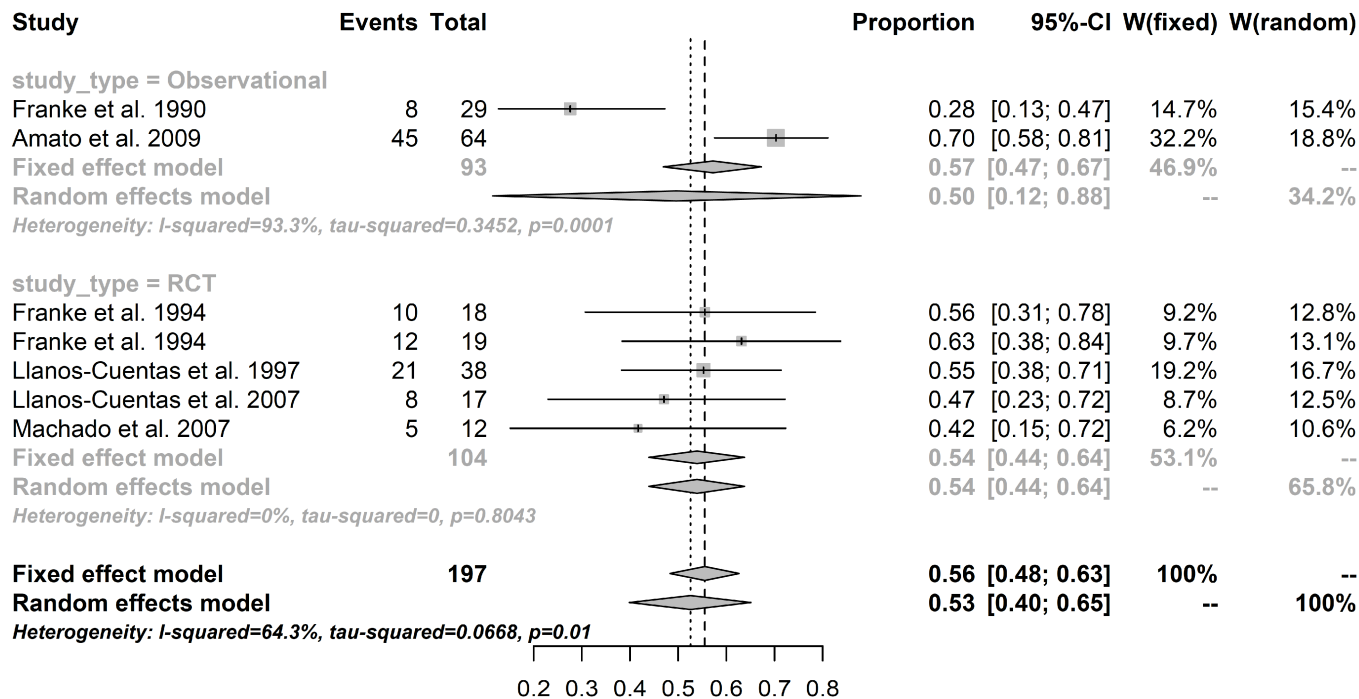

27. Forest plot comparing proportions cured within study-arm for treatment with amphotericin B formulations of patients with mucocutaneous leishmaniasis caused by *L. braziliensis*

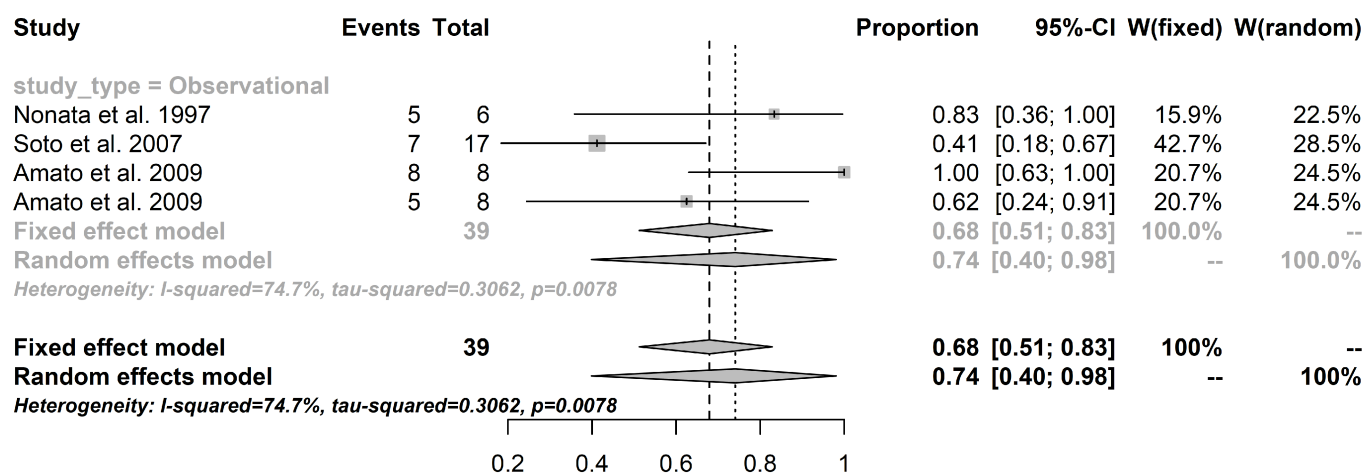

28. Forest plot comparing proportions cured within study-arm for treatment with miltefosine of patients with mucocutaneous leishmaniasis caused by *L. braziliensis*

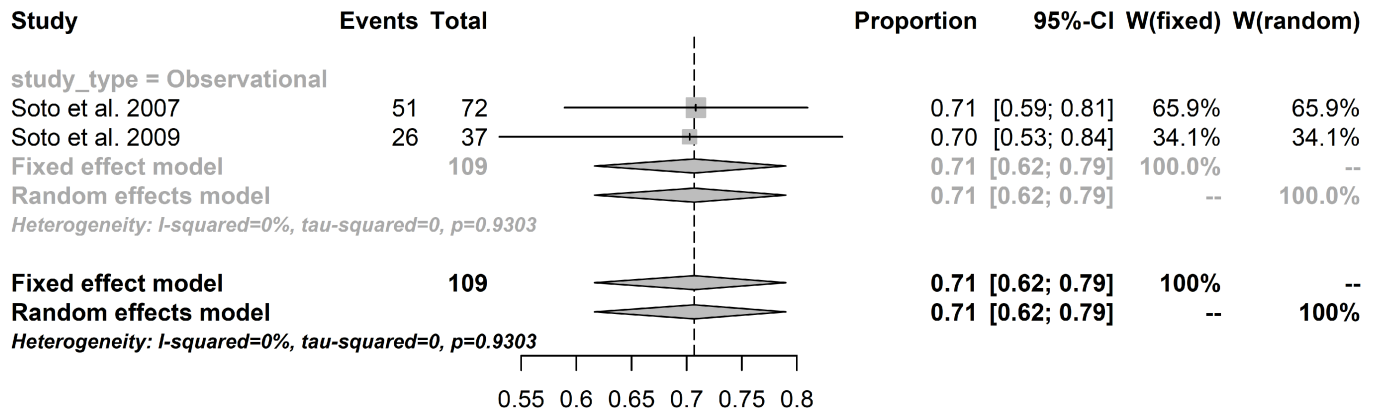

29. Forest plot comparing proportions cured within study-arm for treatment with systemic antimony of patients with cutaneous leishmaniasis caused by *L. panamensis*

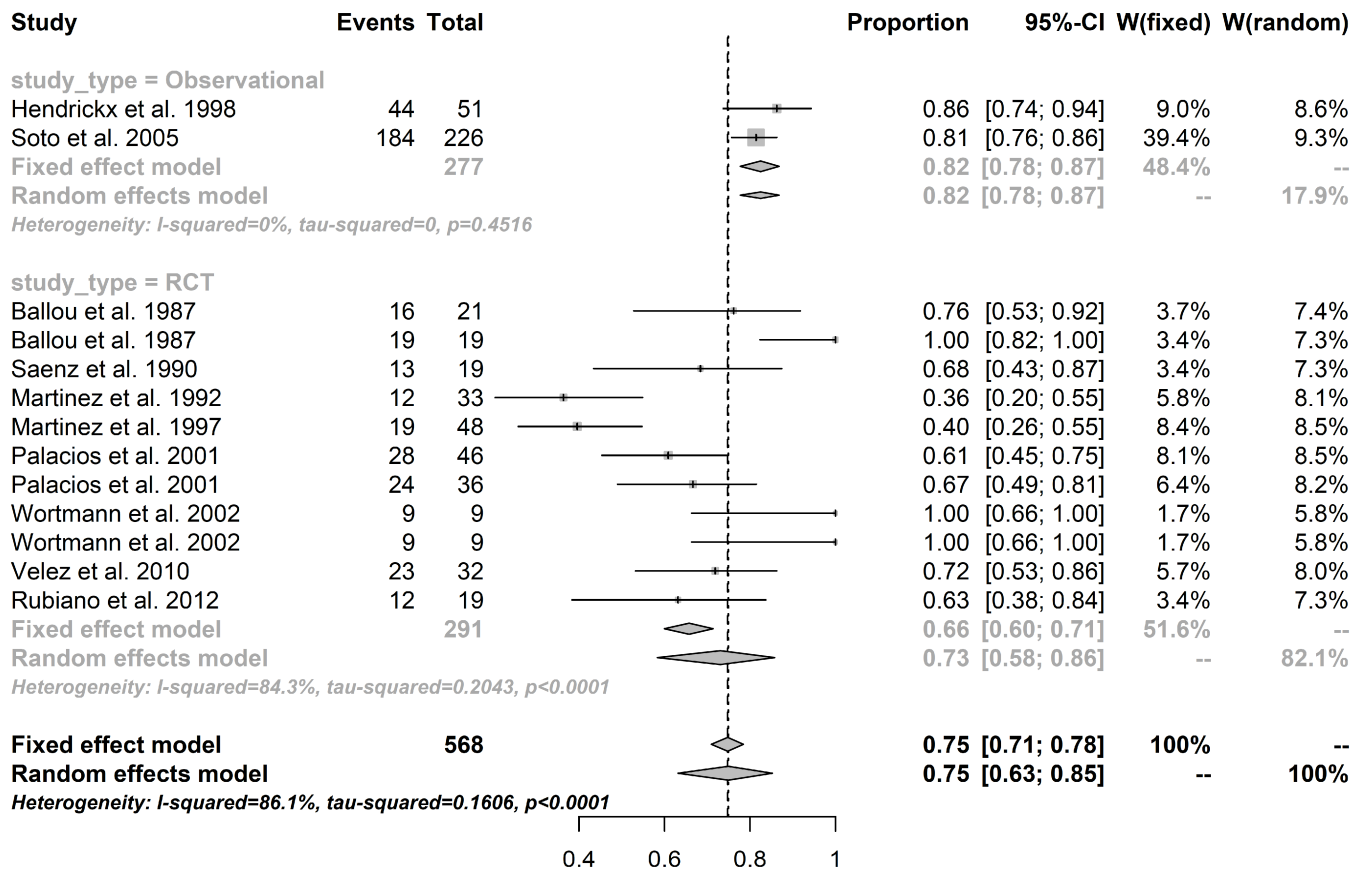

30. Forest plot comparing proportions cured within study-arm for treatment with miltefosine of patients with cutaneous leishmaniasis caused by *L. panamensis*

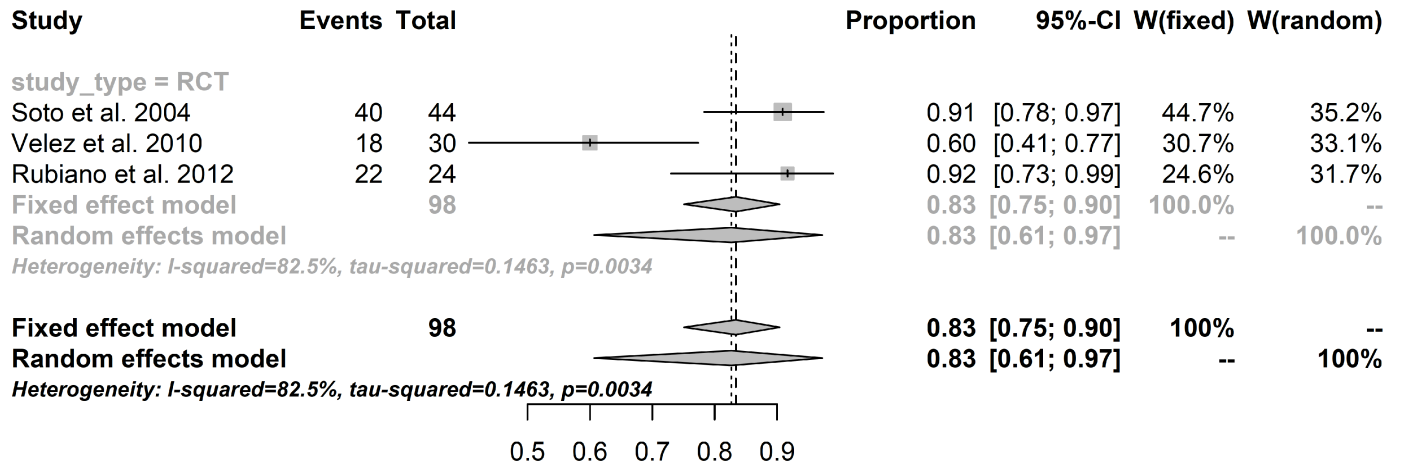

31. Forest plot comparing proportions cured within study-arm for treatment with pentamidine of patients with cutaneous leishmaniasis caused by *L. guyanensis*

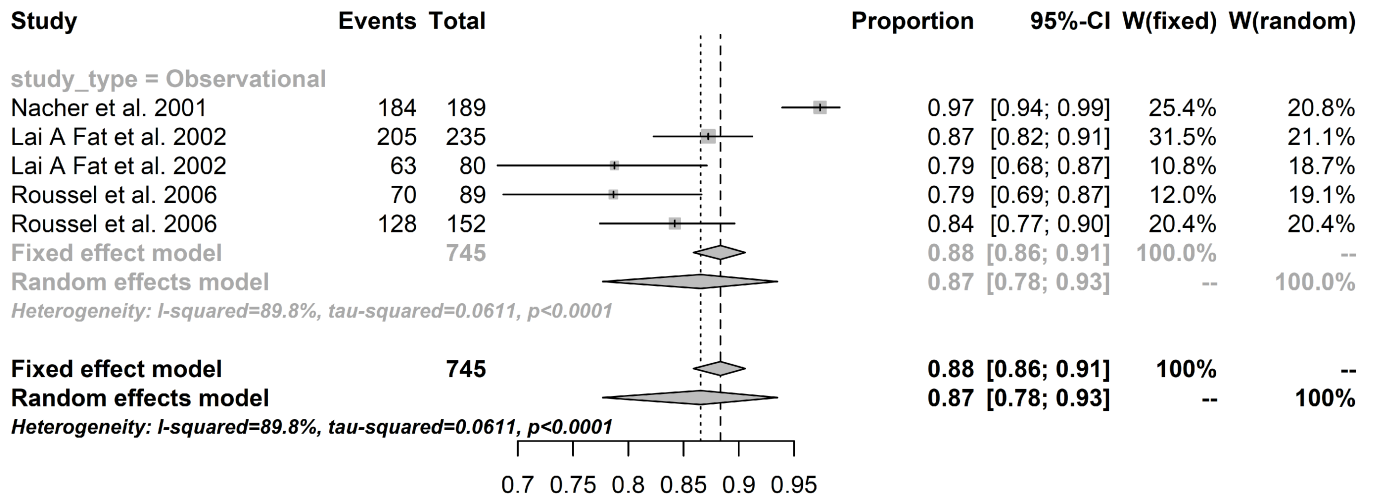

Supplement: pntd.0002832.s003.pdf [file pntd.0002832.s003.pdf]
